# Supplementary material for: Integrated network analysis identifying potential novel drug candidates and targets for Parkinson's disease
Source: PubMed Central journal article supplement (PMC8222400; doi:10.1038/s41598-021-92701-2), 2021-06-23
Supplement: 41598_2021_92701_MOESM1_ESM.pdf [file 41598_2021_92701_MOESM1_ESM.pdf]

## Supplementary material

### Integrated network analysis identifying potential novel drug candidates and targets for Parkinson's disease

Pusheng Quan, Kai Wang, Shi Yan, Shirong Wen, Chengqun Wei, Xinyu Zhang, Jingwei Cao, Lifeng Yao\*

#### Supplementary Figures

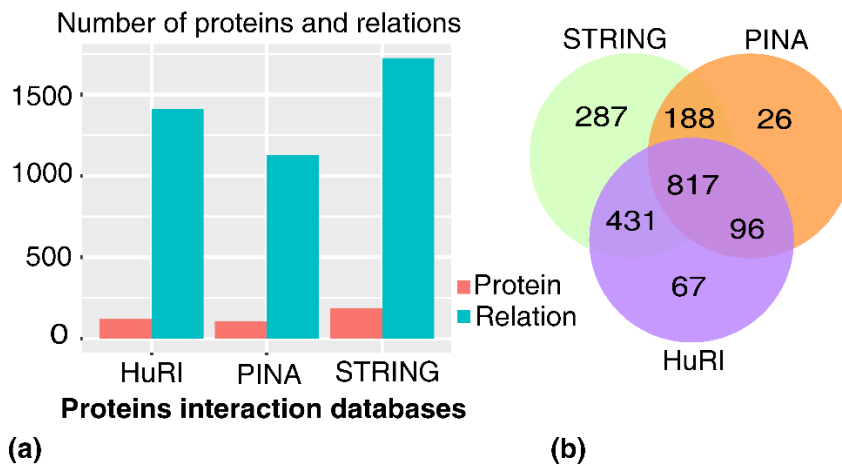

**Supplementary Figure S1: PPI collection.** (a) Bar chart showing the number of proteins and interactions obtained from three databases. (b) Venn diagram show the number of protein-protein interactions collected from three databases. PPI, protein-protein interactions.

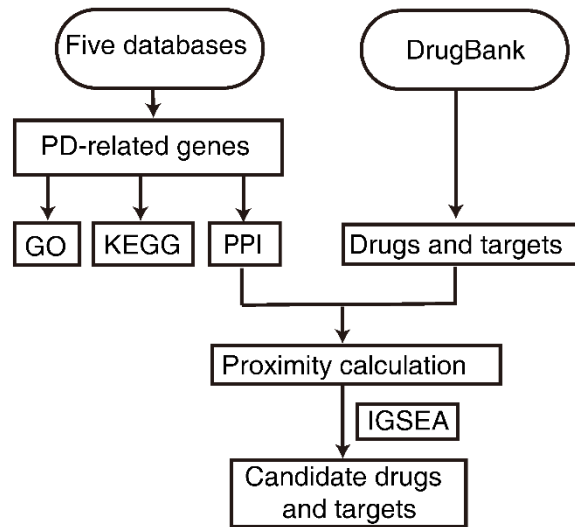

**Supplementary Figure S2. The workflow of the study.**

### Supplementary Table

**Supplementary Table S1.** GO and KEGG enrichment analysis of the nine differentially expressed drug-target genes.

| Category | Term                                     | FDR         | GC* | Gene ID                  |
|----------|------------------------------------------|-------------|-----|--------------------------|
| GO-BP    | GO:0006979~response to oxidative stress  | 0.000314789 | 5   | BCL2/TXNRD1/JUN/AKT1/PML |
|          | GO:0009314~response to radiation         | 0.000314789 | 5   | BCL2/KIT/JUN/AKT1/PML    |
| KEGG     | hsa04722: Neurotrophin signaling pathway | 0.003836    | 3   | BCL2/JUN/AKT1            |
|          | hsa04210: Apoptosis                      | 0.003836    | 3   | BCL2/JUN/AKT1            |
|          | hsa04915: Estrogen signaling pathway     | 0.003836    | 3   | BCL2/JUN/AKT1            |
|          | hsa04010: MAPK signaling pathway         | 0.01463     | 3   | KIT/JUN/AKT1             |
|          | hsa04151: PI3K-Akt signaling pathway     | 0.017499    | 3   | BCL2/KIT/AKT1            |

GC\*: Gene count
